# Supplementary material for: Green light-driven enhanced ammonia sensing at room temperature based on seed-mediated growth of gold-ferrosoferric oxide dumbbell-like heteronanostructures
Source: Royal Society of Chemistry journal article supplement (doi:10.1039/d0nr05530a), 2020-01-01
Supplement: d0nr05530a1.pdf [file d0nr05530a1.pdf]

## Supporting Information

### **Green Light-Driven Enhanced Ammonia Sensing at Room Temperature Based on Seed-Mediated Growth of Gold-Ferrosferric Oxide Dumbbell-Like Heteronanostructures**

Sujing Yu<sup>a</sup>, Dongzhi Zhang <sup>\*a</sup>, Yu Zhang<sup>b</sup>, Wenjing Pan<sup>a</sup>, Benjamin Edem Meteku<sup>b</sup>, Fangdu Zhang<sup>b</sup>, Jingbin Zeng <sup>\*b</sup>

<sup>a</sup> College of Control Science and Engineering, China University of Petroleum (East China), Qingdao 266580, China

<sup>b</sup> College of Science and State Key Laboratory of Heavy Oil Processing, China University of Petroleum (East China), Qingdao 266580, China

\*Corresponding authors: Dongzhi Zhang, Jingbin Zeng

E-mail address: dzzhang@upc.edu.cn, xmuzjb@163.com

Tel: +86-532-86982928

Fax: +86-532-86983326

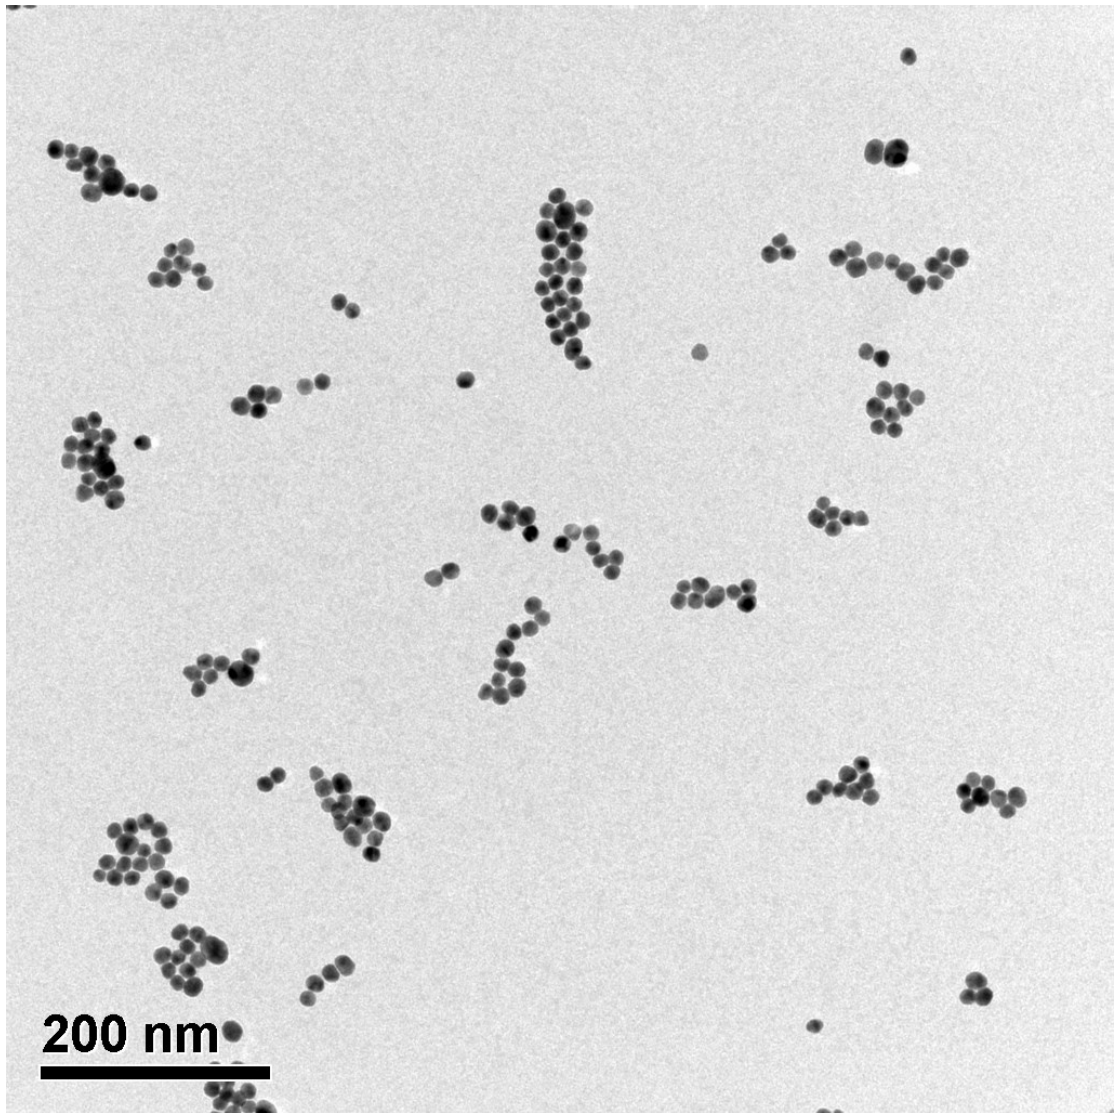

Figure S1. TEM image of the Au nanoparticle sample.
